# Supplementary material
Source: PubMed Central journal article supplement (PMC10147578)
Supplement: NIHMS1876093-supplement-Appendixes.pdf [file NIHMS1876093-supplement-Appendixes.pdf]

## **Appendix 1. REDcap Survey Questions**

- 1) Were you prescribed Paxlovid by your clinician?
- 2) Did you end up taking Paxlovid as prescribed?
  - 2a) What date did you begin to take Paxlovid?
  - 2b) If no, why did you NOT take Paxlovid?
- 3) Did you experience any side effects from taking Paxlovid? If yes, did any of your side effects include the following (check all that apply, and provide dates that each symptom started) altered sense of taste, diarrhea, high blood pressure, muscle aches, or other (please describe)?
- 4) Did you experience any return of COVID-19 symptoms after completing Paxlovid? If yes, which symptoms did you experience (check all that apply, and describe how long symptoms lasted): fever or chills, cough, shortness of breath or difficulty breathing, fatigue, muscle or body aches, headache, new loss of taste or smell, sore throat, congestion or runny nose, nausea or vomiting, diarrhea, abdominal pain, mastitis, decreased milk supply (if lactating), other (please describe)
- 5) Did you have a positive COVID-19 test (PCR/rapid test) after completing Paxlovid?
  - 5a) What date was your positive COVID-19 test after completing Paxlovid?
- 6) Is there anything further that you'd like to share about your experience with Paxlovid?

## Appendix 2. Patient-Reported Free Text Responses

|           |                                                                                                                                                                                                       |
|-----------|-------------------------------------------------------------------------------------------------------------------------------------------------------------------------------------------------------|
| Pregnant  |                                                                                                                                                                                                       |
|           | No research available on pregnant women, so didn't end up taking it because risks were completely unknown.                                                                                            |
|           | I was concerned about the potential effects on the fetus given that it's an experimental drug.                                                                                                        |
|           | It's a new drug and I don't know enough about its efficacy/side effects.                                                                                                                              |
|           | Symptoms were improving, had no risk factors for progression (other than being pregnant) and I was worried about getting rebound covid after Paxlovid.                                                |
|           | My symptoms got very mild.                                                                                                                                                                            |
|           | I was given the option of being prescribed Paxlovid when I got COVID in first trimester, but decided against it since my symptoms were mild and there is limited data on how it affects pregnancy.    |
|           | I had the option to take it and opted not to since I was feeling ok still during those initial days. I did get sick but it never was that bad where I felt I needed further medicine or intervention. |
| Lactating |                                                                                                                                                                                                       |
|           | Only wanted to take it if I felt like my symptoms were getting significantly worse.                                                                                                                   |

Lin CY, Cassidy AG, Li L, Prah MK, Golan Y, Gaw SL. Patient experience with nirmatrelvir–ritonavir for mild coronavirus disease 2019 (covid-19) in pregnancy and lactation. *Obstet Gynecol* 2023;141.

The authors provided this information as a supplement to their article.

©2023 American College of Obstetricians and Gynecologists.
